# Supplementary material for: Circulating Fractalkine Levels Predict the Development of the Metabolic Syndrome
Source: Hindawi journal article supplement (doi:10.1155/2014/715148), 2014-01-01
Supplement: f1 [file 715148.f1.pdf]

**Supplementary table 1. Baseline Characteristics of Participants Completely Investigated**

**According to the Presence or Absence of the Mets (n=459)**

| Variables               | Total               | Metabolic syndrome<br>absent | Metabolic syndrome   | P for trend |
|-------------------------|---------------------|------------------------------|----------------------|-------------|
| n (case/control)        | 459                 | 399                          | 60                   |             |
| Fractalkine(ng/ml)      | 0.43 (0.28-0.64)    | 0.40 (0.25-0.60)             | 0.65 (0.45-0.71)     | <0.001      |
| Age (years)             | 57.25±6.60          | 57.07±6.55                   | 58.30±6.78           | 0.161       |
| Male, n(%)              | 168 (36.6)          | 131 (32.8)                   | 37 (61.7)            | <0.001      |
| Education level, n(%)   |                     |                              |                      | 0.803       |
| Less than high school   | 47 (10.2)           | 41 (10.3)                    | 6 (10.0)             |             |
| High school             | 348 (75.8)          | 303 (75.9)                   | 45 (75.0)            |             |
| More than high school   | 64 (13.9)           | 55 (13.8)                    | 9 (15.0)             |             |
| Current smoker,n(%)     | 359 (78.2)          | 322 (80.7)                   | 37 (61.7)            | 0.001       |
| Alcohol drinker,n(%)    | 365 (79.5)          | 325 (81.5)                   | 40 (66.7)            | 0.008       |
| BMI(kg/m <sup>2</sup> ) | 23.43±2.81          | 23.02±2.65                   | 25.83±2.50           | <0.001      |
| WC (cm)                 | 78.18±9.02          | 76.51±8.27                   | 88.00±6.69           | <0.001      |
| WHR                     | 0.87±0.07           | 0.85±0.07                    | 0.94±0.05            | <0.001      |
| Fat% (%)                | 29.29±6.80          | 28.83±6.69                   | 31.99±6.84           | <0.001      |
| SBP (mm Hg)             | 124.31±16.68        | 122.32±15.94                 | 135.91±16.23         | <0.001      |
| DBP (mm Hg)             | 81.45±9.92          | 80.39±9.71                   | 87.61±8.88           | <0.001      |
| FPG (mmol/L)            | 4.89 (4.50-5.22)    | 4.83 (4.50-5.17)             | 5.11 (4.83-5.94)     | <0.001      |
| 2h PG (mmol/L)          | 5.50 (4.50-6.67)    | 5.33 (4.33-6.33)             | 7.22 (5.28-10.17)    | <0.001      |
| FINS (μU/ml)            | 11.09 (8.23-14.09)  | 10.61 (8.11-13.32)           | 14.95 (11.98-18.54)  | <0.001      |
| 2h INS (μU/ml)          | 58.92 (37.91-97.05) | 55.68 (35.96-82.56)          | 86.13 (52.29-136.56) | <0.001      |

|                          |                        |                        |                        |        |
|--------------------------|------------------------|------------------------|------------------------|--------|
| HOMA-IR                  | 2.38 (1.79-3.20)       | 2.25 (1.71-2.99)       | 3.44 (2.60-5.28)       | <0.001 |
| HbA1 <sub>c</sub> (%)    | 5.67±0.65              | 5.62±0.60              | 5.91±0.84              | 0.001  |
| TC (mmol/L)              | 5.57 (4.90-6.22)       | 5.52 (4.87-6.19)       | 5.36 (4.25-8.00)       | 0.070  |
| LDL-c (mmol/L)           | 2.40±0.57              | 2.40±0.56              | 2.41±0.62              | 0.971  |
| HDL-c (mmol/L)           | 1.46±0.37              | 1.52±0.35              | 1.11±0.23              | <0.001 |
| TG (mmol/L)              | 1.30 (0.95-1.84)       | 1.23 (0.88-1.58)       | 2.51 (2.29-2.84)       | <0.001 |
| CRP (mg/dL)              | 0.62 (0.30-1.67)       | 0.58 (0.30-1.65)       | 1.19 (0.72-3.49)       | 0.021  |
| SFA (cm <sup>2</sup> )   | 156.50 (119.05-205.03) | 155.25 (116.38-205.00) | 163.40 (126.73-207.58) | 0.027  |
| VFA (cm <sup>2</sup> )   | 68.96 (46.07-109.25)   | 63.92 (41.40-97.49)    | 117.45 (85.79-167.38)  | <0.001 |
| Central obesity (%)      | 55 (11.98)             | 26 (6.5)               | 29 (48.3)              | <0.001 |
| Elevated BP (%)          | 242 (52.7)             | 186 (46.6)             | 56 (93.3)              | <0.001 |
| Hyperglycemia (%)        | 75 (16.3)              | 44 (11.0)              | 31 (51.7)              | <0.001 |
| Hypertriglyceridemia (%) | 137 (29.8)             | 80 (20.1)              | 57 (95.0)              | <0.001 |
| Low HDL-c (%)            | 41 (8.9)               | 11 (2.8)               | 30 (50.0)              | <0.001 |

Variables with normal distributions are presented as mean ± SD; skewed variables are presented as the median value (inter-quartile range) [M (IQR)]. The Chi-squared test was used for categorical values and t-test for continuous. P for trend depicts the significance in the difference of the mean values between participants with and without metabolic syndrome.

Abbreviations as in Table 1.
